# Supplementary material for: The Chromosomal High-Affinity Binding Sites for the Drosophila Dosage Compensation Complex
Source: PLoS Genet. 2008 Dec 12;4(12):e1000302. doi: 10.1371/journal.pgen.1000302 (PMC2586088; doi:10.1371/journal.pgen.1000302)
Supplement: Table S2 — Sequences of primers for generation of dsRNA and primers for FISH probe productions. (0.02 MB XLS) [file pgen.1000302.s005.xls]

## Sheet: Tabelle1
Primer used for generation of dsRNA
primer sequence	primer description
TTAATACGACTCACTATAGGGAGAATGTCCCCTATACTAGGTTA	GST forward primer
TTAATACGACTCACTATAGGGAGAACGCATCCAGGCACATTG	GST reverse primer
TTAATACGACTCACTATAGGGAGAATGGATATAAAATCTTTTTTGTACCAATTTTG	MLE forward primer
TTAATACGACTCACTATAGGGAGAACAGGGCGCATGACTTGCT	MLE reverse primer
TTAATACGACTCACTATAGGGAGAATGACGGAGCTAAGGGACGA	MSL3 forward primer
TTAATACGACTCACTATAGGGAGAGTTTGTCTGCCCCGGTTTC	MSL3 reverse primer
TTAATACGACTCACTATAGGGAGAATGTCTGAAGCGGAGCTGGAAC	MOF forward primer
TTAATACGACTCACTATAGGGAGATTTCTGCTTCTGCGGCTGC	MOF reverse primer
Primer used for generation of FISH probes
primer sequence	primer description
TCGTTTAGGTAGCTCGGAT	roX2 forward primer 1
CGCAATCCGAACTGCGCTTA	roX2 reverse primer 1
GCTCATCCTTGTGTCGCGTA	roX2 forward primer 2
ATCGTTGTGCATGTGCAGGT	roX2 reverse primer 2
CATCATCAAGCAACCAGCAA	roX2 forward primer 3
GCACCTCCGAGGTATCATCA	roX2 reverse primer 3
CGCATCAGTTGCCAGTCGAT	roX2 forward primer 4
GTGCTGAGGTGGAGCACATT	roX2 reverse primer 4
CTGTCTCGACACTTGATACA	roX2 forward primer 5
CGCAAATGAACGTATGTCA	roX2 reverse primer 5
TGGCCATGATTGTGGTGATG	Suv4-20 forward primer
CACAGAGAAGCAGCAGACAA	Suv4-20 reverse primer
TCGTTGGCCAACCGATCGTA	regucalcin forward primer
GGACTGTTGCTAGAGGTATG	regucalcin reverse primer
TTGTCAGGAGGAGATGCACT	l(1)G0136 forward primer
TGTCACGGGATAGCGGAGAA	l(1)G0136 reverse primer
TCTCGGTCTCGTTGCACTCA	nej upstream forward primer
AGCTACACAGCGGCCACAAT	nej upstream reverse primer
TAACTAAGCGCGGTGAAACC	Or2a forward primer
GCTGGCTGCAGCTAAGATGT	Or2a reverse primer
CGAATCCTCGACAACTGAAT	dpr8 forward primer 1
AAAGTTCGCAATTCGCCTTA	dpr8 reverse primer 1
CGGCCATATGGGCAATAACC	dpr8 forward primer 2
GTGCCTGGATGTAAGAGTCA	dpr8 reverse primer 2
GCAACAGAAATTGTTGCCAT	dpr8 forward primer 3
AGCTGCCGTCTGTAAGACAA	dpr8 reverse primer 3
AAGCCAAAGCCAAAGCCTCT	dpr8 forward primer 4
GGGGCATCTTTGGAAAACAA	dpr8 reverse primer 4
GCCAGTAGTCCGTGTTGTTT	dpr8 forward primer 5
CCCGAATTTATTGCCAACGA	dpr8 reverse primer 5
GCTGGTTGGTTTAGAATCATG	nup153 forward primer 1
ATCAAGCTCTACCCGAATGT	nup153 reverse primer 1
TGAGCAGAGCGTGAAGAAGA	nup153 forward primer 2
AGGGCCACCTCCTCATAGTT	nup153 reverse primer 2
AGTCGGCTAACCATACTCAG	nup153 forward primer 3
TCGCTATTGGAGTCGAAGAT	nup153 reverse primer 3
CACGAATTCCAATCCGCTTT	nup153 forward primer 4
TGACCTCGCATTACCTGCAT	nup153 reverse primer 4
GGTTCGGTCCAGAGCCAATA	nup153 forward primer 5
ATTAGTGCTGGAACGGCTAT	nup153 reverse primer 5
CTTCAGCGAGTTGAGGAAGTC	nup153 forward primer 6
ATTGAATAACCCGTCCAACCA	nup153 reverse primer 6
CTGTGCTATCTGCTCCCATG	phl forward primer
TAAATGTTCTTCATCGTGCT	phl reverse primer
